# Supplementary material for: Coordination Sites for Sodium and Potassium Ions in Nucleophilic Adeninate Contact ion-Pairs: A Molecular-Wide and Electron Density-Based (MOWED) Perspective
Source: MDPI journal article supplement (doi:10.3390/molecules27186111), 2022-09-19
Supplement: s1 [file s1]

# Coordination Sites for Sodium and Potassium Ions in Nucleophilic Adeninate Contact ion-Pairs: A Molecular-Wide and Electron Density-Based (MOWED) Perspective

Dominique M.S. Buyens , Lynne A. Pilcher and Ignacy Cukrowski \*

Department of Chemistry, University of Pretoria, Pretoria 0002, Republic of South Africa;

\* Correspondence: ignacy.cukrowski@up.ac.za

## Supplementary Materials

| Table of contents:                                             | Page |
|----------------------------------------------------------------|------|
| Additional CCSD data for the implicit solvation model          | 2    |
| Additional DFT data for the implicit solvation model           | 4    |
| Additional Figures and Tables for the explicit solvation model | 9    |

## Additional CCSD data for the implicit solvent model

**Table S1:** CCSD-computed intermolecular diatomic interaction energies between  $\text{Na}^+$  with the atoms of the adeninate anion for the specified Na-Ade complexes (CIPs). All values in  $\text{kcal mol}^{-1}$

| Atom         | CIPs          |               |               |              |              |              |              |
|--------------|---------------|---------------|---------------|--------------|--------------|--------------|--------------|
|              | N3N9          | N9            | N3            | N7           | N1           | N10          | $\pi$        |
| N1           | -78.3         | -68.3         | -82.8         | -71.8        | -177.9       | -102.6       | -93.1        |
| C2           | 93.1          | 74.6          | 102.1         | 59.1         | 105.7        | 72.9         | 83.4         |
| N3           | -161.9        | -114.6        | -181.0        | -67.3        | -88.5        | -73.5        | -101.2       |
| C4           | 111.3         | 95.9          | 100.6         | 59.9         | 55.8         | 55.9         | 76.6         |
| C5           | 28.2          | 27.0          | 25.5          | 40.5         | 24.1         | 30.1         | 29.4         |
| C6           | 58.3          | 52.9          | 58.5          | 71.7         | 98.8         | 94.5         | 75.0         |
| N7           | -79.8         | -82.0         | -71.7         | -179.3       | -64.3        | -92.0        | -103.0       |
| C8           | 86.9          | 92.2          | 71.4          | 96.9         | 48.5         | 61.3         | 81.6         |
| N9           | -173.0        | -182.7        | -124.2        | -84.7        | -60.1        | -66.9        | -103.2       |
| N10          | -56.1         | -52.8         | -55.7         | -92.7        | -100.2       | -155.0       | -81.6        |
| H11          | 18.2          | 16.9          | 18.3          | 27.6         | 39.3         | 43.7         | 24.7         |
| H12          | 18.9          | 18.1          | 18.5          | 37.9         | 29.2         | 44.1         | 26.4         |
| H13          | 3.1           | 2.1           | 3.2           | 1.7          | 2.5          | 2.2          | 2.3          |
| H14          | 3.0           | 2.8           | 2.1           | 2.7          | 1.4          | 1.7          | 2.2          |
| <b>Total</b> | <b>-128.0</b> | <b>-117.8</b> | <b>-115.1</b> | <b>-97.8</b> | <b>-85.6</b> | <b>-83.5</b> | <b>-80.5</b> |

**Table S2:** CCSD-computed intermolecular diatomic interaction energies between  $\text{K}^+$  with the atoms of the adeninate anion for the specified K-Ade complexes (CIPs). All values in kcal mol<sup>-1</sup>

| <b>Atom</b>  | <b>CIPs</b>   |              |              |              |
|--------------|---------------|--------------|--------------|--------------|
|              | <b>N3N9</b>   | <b>N7</b>    | <b>N1</b>    | <b>N10</b>   |
| N1           | -74.9         | -68.1        | -158.8       | -158.8       |
| C2           | 87.8          | 56.1         | 96.7         | 96.7         |
| N3           | -152.1        | -64.3        | -83.9        | -83.9        |
| C4           | 99.5          | 56.5         | 53.0         | 53.0         |
| C5           | 26.1          | 36.2         | 22.6         | 22.6         |
| C6           | 55.4          | 66.6         | 89.9         | 89.9         |
| N7           | -75.1         | -160.2       | -61.7        | -61.7        |
| C8           | 79.4          | 88.9         | 46.6         | 46.6         |
| N9           | -154.7        | -80.6        | -57.9        | -57.9        |
| N10          | -53.8         | -86.4        | -93.9        | -93.9        |
| H11          | 17.5          | 25.9         | 35.9         | 35.9         |
| H12          | 18.1          | 34.4         | 27.5         | 27.5         |
| H13          | 2.7           | 1.6          | 1.9          | 1.9          |
| H14          | 2.5           | 2.1          | 1.3          | 1.3          |
| <b>Total</b> | <b>-121.6</b> | <b>-91.4</b> | <b>-80.7</b> | <b>-80.7</b> |

### Additional DFT/B3LYP data for the implicit solvation model

**Table S3:** DFT-computed intermolecular diatomic interaction energies between  $\text{Na}^+$  with the atoms of the adeninate anion for the specified Na-Ade complexes (CIPs). All values in  $\text{kcal mol}^{-1}$

| Atom         | CIPs          |               |               |               |              |              |              |
|--------------|---------------|---------------|---------------|---------------|--------------|--------------|--------------|
|              | N3N9          | N9            | N3            | N7            | N1           | N10          | $\pi$        |
| N1           | -73.4         | -63.6         | -77.0         | -66.5         | -142.1       | -97.5        | -97.5        |
| C2           | 86.8          | 68.7          | 93.7          | 54.0          | 85.6         | 67.7         | 87.1         |
| N3           | -161.4        | -110.0        | -176.9        | -62.7         | -75.6        | -69.3        | -109.4       |
| C4           | 104.4         | 90.0          | 93.1          | 55.5          | 47.6         | 52.1         | 75.4         |
| C5           | 26.7          | 25.6          | 24.0          | 38.3          | 21.0         | 28.5         | 27.4         |
| C6           | 54.1          | 48.7          | 53.8          | 66.2          | 82.6         | 87.2         | 73.2         |
| N7           | -74.2         | -76.4         | -66.7         | -175.4        | -57.7        | -86.1        | -93.3        |
| C8           | 78.2          | 83.4          | 64.2          | 87.5          | 41.5         | 55.2         | 73.1         |
| N9           | -164.7        | -178.2        | -116.4        | -78.7         | -53.1        | -62.5        | -99.7        |
| N10          | -54.3         | -50.9         | -53.7         | -89.5         | -91.9        | -150.9       | -79.1        |
| H11          | 18.4          | 17.0          | 18.4          | 27.7          | 38.2         | 43.8         | 27.1         |
| H12          | 19.1          | 18.2          | 18.5          | 38.3          | 28.2         | 43.9         | 28.2         |
| H13          | 3.3           | 2.2           | 3.3           | 1.7           | 2.2          | 2.3          | 2.8          |
| H14          | 3.4           | 3.4           | 2.4           | 3.4           | 1.4          | 2.0          | 2.6          |
| <b>Total</b> | <b>-133.6</b> | <b>-122.1</b> | <b>-119.4</b> | <b>-100.1</b> | <b>-72.1</b> | <b>-83.8</b> | <b>-82.3</b> |

**Table S4:** DFT-computed intermolecular diatomic interaction energies between  $\text{K}^+$  with the atoms of the adeninate anion for the specified K-Ade complexes (CIPs). All values in kcal mol<sup>-1</sup>

| <b>Atom</b>  | <b>CIPs</b>   |              |              |              |
|--------------|---------------|--------------|--------------|--------------|
|              | <b>N3N9</b>   | <b>N7</b>    | <b>N1</b>    | <b>N10</b>   |
| N1           | -68.9         | -63.9        | -148.3       | -103.7       |
| C2           | 79.3          | 51.8         | 86.6         | 73.6         |
| N3           | -143.5        | -60.4        | -77.1        | -76.4        |
| C4           | 90.8          | 52.4         | 48.5         | 56.2         |
| C5           | 24.3          | 34.2         | 21.2         | 27.3         |
| C6           | 50.4          | 62.2         | 82.1         | 83.5         |
| N7           | -69.6         | -152.8       | -57.9        | -85.9        |
| C8           | 71.1          | 79.2         | 41.8         | 57.4         |
| N9           | -145.8        | -74.9        | -53.6        | -67.2        |
| N10          | -51.3         | -84.9        | -91.0        | -128.9       |
| H11          | 17.4          | 26.2         | 36.2         | 38.0         |
| H12          | 18.0          | 35.0         | 27.6         | 37.7         |
| H13          | 2.7           | 1.6          | 2.1          | 2.5          |
| H14          | 2.8           | 2.7          | 1.5          | 2.1          |
| <b>Total</b> | <b>-122.2</b> | <b>-91.5</b> | <b>-80.2</b> | <b>-83.8</b> |

**Influence of the CIP formation on the intramolecular diatomic covalent (CB) and long-distance (LD) interactions between non-bonded atoms of the adeninate anion: DFT data**

**Table S5:** DFT-computed changes in the total intramolecular interaction energy of the adeninate anion ( $\Delta E_{\text{int}}^{\text{Ade}^-}$ ), the total CB-interactions ( $\Delta^{\text{CB}} E_{\text{int}}^{\text{Ade}^-}$ ) and total LD-interactions ( $\Delta^{\text{LD}} E_{\text{int}}^{\text{Ade}^-}$ ) calculated for the indicated Na-Ade and K-Ade complexes. All values in kcal mol<sup>-1</sup>

|                                                    | CIPs   |       |       |       |      |       |           |
|----------------------------------------------------|--------|-------|-------|-------|------|-------|-----------|
|                                                    | (N3N9) | (N9)  | (N3)  | (N7)  | (N1) | (N10) | ( $\pi$ ) |
| <b>Na-Ade complexes</b>                            |        |       |       |       |      |       |           |
| $\Delta E_{\text{int}}^{\text{Ade}^-}$             | -32.5  | -22.2 | -23.3 | -12.3 | -8.1 | 20.2  | 1.0       |
| $\Delta^{\text{CB}} E_{\text{int}}^{\text{Ade}^-}$ | -43.1  | -29.1 | -30   | -14.2 | -9.3 | 31.6  | 1.8       |
| $\Delta^{\text{LD}} E_{\text{int}}^{\text{Ade}^-}$ | 10.6   | 7.0   | 6.7   | 1.9   | 1.2  | -11.4 | -0.8      |
| <b>K-Ade complexes</b>                             |        |       |       |       |      |       |           |
| $\Delta E_{\text{int}}^{\text{Ade}^-}$             | -19.1  | -     | -     | -3.3  | -0.7 | 14.9  | -         |
| $\Delta^{\text{CB}} E_{\text{int}}^{\text{Ade}^-}$ | -24.5  | -     | -     | -2.5  | 2    | 24    | -         |
| $\Delta^{\text{LD}} E_{\text{int}}^{\text{Ade}^-}$ | 5.4    | -     | -     | -0.8  | -2.7 | -9.1  | -         |

**Table S6:** The total change in the exchange correlation ( $\Delta^{\text{CB}} V_{\text{XC}}^{\text{Ade}^-}$ ) and classical ( $\Delta^{\text{CB}} V_{\text{cl}}^{\text{Ade}^-}$ ) terms of the interactions between covalently bonded atoms of the adeninate anion, calculated for Na-Ade and K-Ade complexes at the DFT level. All values in kcal mol<sup>-1</sup>

|                                                   | CIPs   |       |       |       |       |       |           |
|---------------------------------------------------|--------|-------|-------|-------|-------|-------|-----------|
|                                                   | (N3N9) | (N9)  | (N3)  | (N7)  | (N1)  | (N10) | ( $\pi$ ) |
| <b>Na-Ade complexes</b>                           |        |       |       |       |       |       |           |
| $\Delta^{\text{CB}} V_{\text{XC}}^{\text{Ade}^-}$ | 6.0    | 4.2   | 4.6   | 3.5   | 2     | 2.3   | 0.5       |
| $\Delta^{\text{CB}} V_{\text{cl}}^{\text{Ade}^-}$ | -41.9  | -33.3 | -34.6 | -17.8 | -11.3 | 29.3  | 1.3       |
| <b>K-Ade complexes</b>                            |        |       |       |       |       |       |           |
| $\Delta^{\text{CB}} V_{\text{XC}}^{\text{Ade}^-}$ | 4.4    | -     | -     | 2.2   | 1.9   | 1.6   | -         |
| $\Delta^{\text{CB}} V_{\text{cl}}^{\text{Ade}^-}$ | -28.9  | -     | -     | -4.7  | 0     | 22.3  | -         |

### Change in net atomic charges upon CIP formation – DFT data

**Table S7:** Net atomic charges of the atoms  $Q(A)$  of free  $\text{Ade}^-$ , the net molecular charge of  $\text{Ade}^-$   $Q(\text{Ade}^-)$  and counter ions  $Q(\text{Na}^+)$  and  $Q(\text{K}^+)$ . Relative to free ions, changes in these charges, obtained for each of the CIPs, are also included. All values are in  $e$  and are reported at the DFT level of theory

| Atom A            | $Q(A)$                 |                          |        |        |        |        |        |        |
|-------------------|------------------------|--------------------------|--------|--------|--------|--------|--------|--------|
|                   | Free<br>$\text{Ade}^-$ | CIPs                     |        |        |        |        |        |        |
|                   |                        | Na-Ade complexes         |        |        |        |        |        |        |
|                   |                        | N3N9                     | N9     | N3     | N7     | N1     | N10    | $\pi$  |
| N3                | -1.193                 | -0.024                   | 0.001  | -0.025 | 0.004  | 0.003  | 0.006  | 0.002  |
| N1                | -1.177                 | 0.010                    | 0.005  | 0.006  | 0.004  | -0.014 | 0.002  | 0.002  |
| N9                | -1.166                 | -0.025                   | -0.023 | -0.002 | 0.006  | 0.003  | 0.007  | 0.003  |
| N7                | -1.159                 | 0.017                    | 0.008  | 0.008  | -0.019 | 0.002  | 0.006  | 0.003  |
| N10               | -1.105                 | -0.007                   | -0.004 | -0.006 | 0.008  | 0.001  | 0.019  | -0.004 |
| C5                | 0.352                  | 0.005                    | 0.002  | 0.006  | -0.003 | 0.004  | 0.006  | -0.005 |
| C4                | 0.838                  | -0.007                   | 0.002  | 0.002  | 0.007  | 0.002  | 0.013  | -0.010 |
| C8                | 0.881                  | 0.013                    | 0.013  | 0.002  | 0.012  | 0.001  | 0.004  | -0.001 |
| C6                | 0.897                  | 0.016                    | 0.011  | 0.010  | 0.003  | 0.003  | -0.039 | 0.006  |
| C2                | 0.990                  | 0.015                    | 0.004  | 0.013  | 0.007  | 0.004  | -0.001 | 0.000  |
| H13               | 0.024                  | 0.012                    | 0.005  | 0.010  | 0.005  | 0.003  | 0.006  | 0.003  |
| H14               | 0.024                  | 0.012                    | 0.009  | 0.005  | 0.009  | 0.002  | 0.005  | 0.003  |
| H11               | 0.396                  | 0.008                    | 0.005  | 0.006  | 0.001  | 0.000  | -0.003 | 0.003  |
| H12               | 0.398                  | 0.007                    | 0.004  | 0.006  | -0.004 | 0.002  | -0.004 | 0.003  |
| $Q(\text{Ade}^-)$ | -1.000                 | $\Delta Q(\text{Ade}^-)$ | 0.051  | 0.043  | 0.041  | 0.040  | 0.017  | 0.026  |
| $Q(\text{Na}^+)$  | 1.000                  | $\Delta Q(\text{Na}^+)$  | -0.052 | -0.043 | -0.041 | -0.040 | -0.017 | -0.026 |

Table S7 continues

| <b>Q(A)</b>          |                          |                        |        |           |           |            |        |
|----------------------|--------------------------|------------------------|--------|-----------|-----------|------------|--------|
| <b>Atom A</b>        | <b>K-Ade complexes</b>   |                        |        |           |           |            |        |
|                      | <b>N3N9</b>              |                        |        | <b>N7</b> | <b>N1</b> | <b>N10</b> |        |
| N3                   | -0.009                   | -                      | -      | 0.004     | 0.004     | 0.006      | -      |
| N1                   | 0.007                    | -                      | -      | 0.003     | -0.004    | 0.002      | -      |
| N9                   | -0.008                   | -                      | -      | 0.005     | 0.005     | 0.007      | -      |
| N7                   | 0.011                    | -                      | -      | -0.004    | 0.004     | 0.006      | -      |
| N10                  | -0.005                   | -                      | -      | 0.008     | 0.004     | 0.012      | -      |
| C5                   | 0.004                    | -                      | -      | -0.002    | 0.005     | 0.002      | -      |
| C4                   | -0.009                   | -                      | -      | 0.004     | 0.005     | 0.011      | -      |
| C8                   | 0.009                    | -                      | -      | 0.006     | 0.002     | 0.004      | -      |
| C6                   | 0.011                    | -                      | -      | 0.000     | -0.004    | -0.038     | -      |
| C2                   | 0.011                    | -                      | -      | 0.004     | -0.001    | 0.000      | -      |
| H13                  | 0.008                    | -                      | -      | 0.004     | 0.003     | 0.006      | -      |
| H14                  | 0.008                    | -                      | -      | 0.006     | 0.003     | 0.005      | -      |
| H11                  | 0.006                    | -                      | -      | 0.000     | 0.000     | 0.001      | -      |
| H12                  | 0.005                    | -                      | -      | -0.004    | 0.003     | 0.000      | -      |
| Q(Ade <sup>-</sup> ) | $\Delta Q(\text{Ade}^-)$ | 0.050                  | -      | -         | 0.036     | 0.030      | 0.025  |
| Q(K <sup>+</sup> )   | 1.000                    | $\Delta Q(\text{K}^+)$ | -0.050 |           | -0.036    | -0.030     | -0.024 |

## Explicit solvation model

The geometries for the out-of-plane N10-CIP is shown in Figure S1. The energy of the N10-CIP within the M-Ade-(DMSO)<sub>4</sub> systems was obtained by removing the explicit DMSO molecules and performing a single point energy calculation on the M-Ade complex. The energy of the N10-CIP is more than 5 kcal mol<sup>-1</sup> less stable than the lowest energy N-CIP in the main text (Figure 2) and therefore won't be considered further in the main text.

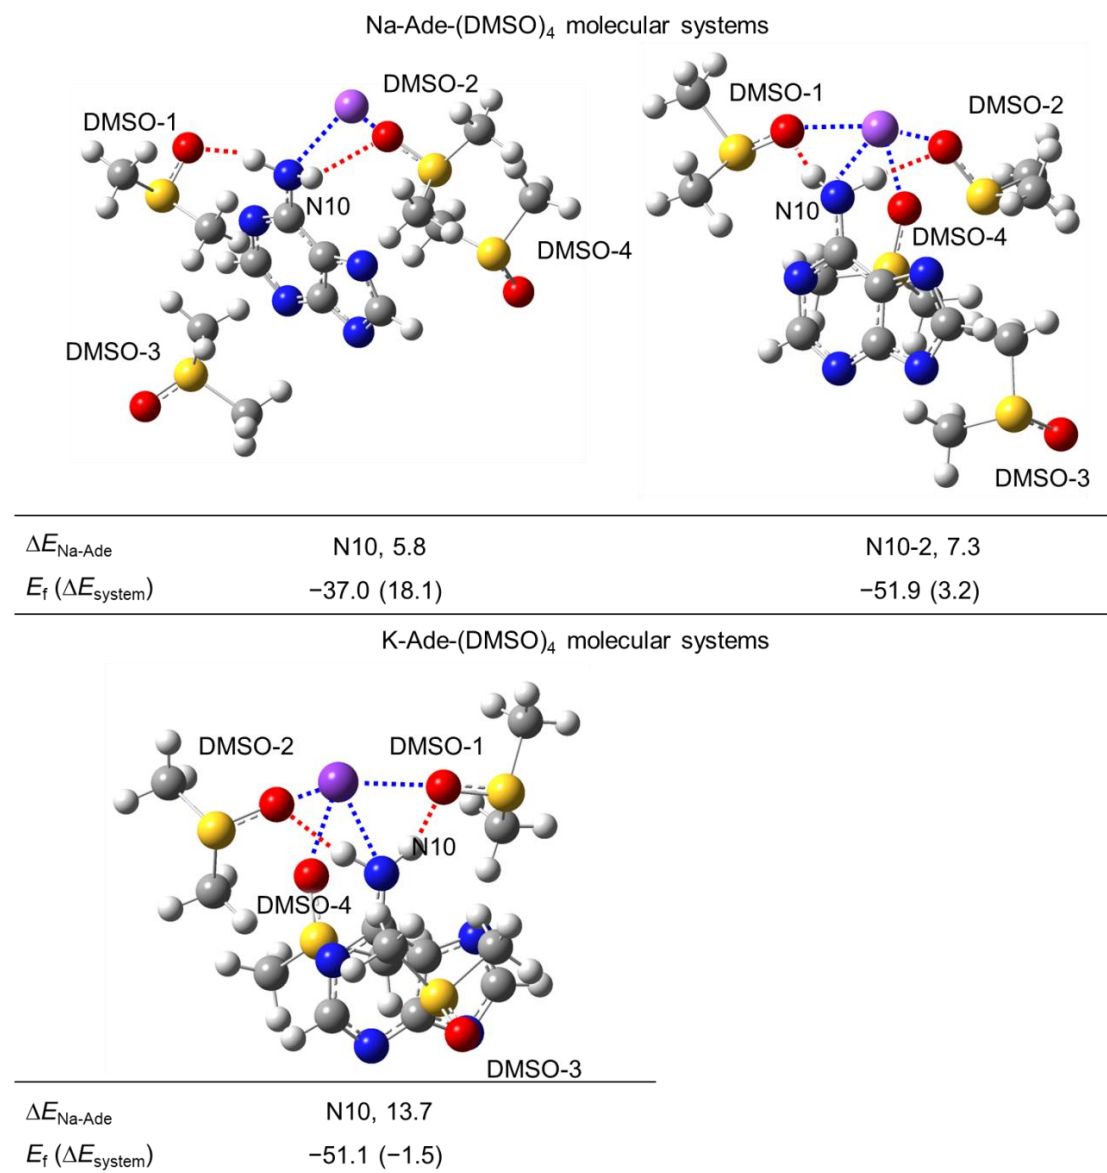

**Figure S1:** DFT-optimized structures of the indicated out-of-plane Na- and K-Ade-(DMSO)<sub>4</sub> systems and, relative to the lowest energy N-CIP in the main text (Figure 2), the energy difference  $\Delta E_{\text{Na-Ade}}$  between Na-Ade complexes solvated by four DMSO molecules. The energy of formation ( $E_f$ ) of the Na- and K-Ade-(DMSO)<sub>4</sub> molecular systems and, relative to the lowest energy system in the main text (Figure 2), the electronic energy difference between entire molecular systems ( $\Delta E_{\text{system}}$ ) are also provided. All values are in kcal mol<sup>-1</sup>.

**Interactions between DMSO solvent molecules and Na<sup>+</sup> and K<sup>+</sup> counter ions in M-Ade-(DMSO)<sub>4</sub> molecular systems**

**Table S8:** The total interaction energy  $E_{\text{int}}^{\text{M}^+, \text{DMSO}}$  and its covalent  $V_{\text{XC}}^{\text{M}^+, \text{DMSO}}$  and electrostatic  $V_{\text{cl}}^{\text{M}^+, \text{DMSO}}$  components computed for the for DMSO-1 and DMSO-2 solvent molecules and counter ions Na<sup>+</sup> and K<sup>+</sup> in the in-plane M-Ade-(DMSO)<sub>4</sub> molecular systems. All values in kcal mol<sup>-1</sup> at the DFT level of theory.

|                                                    | CIPs |     |     |       |       |
|----------------------------------------------------|------|-----|-----|-------|-------|
|                                                    | N3N9 | N9  | N3  | N7    | N1    |
| <b>Na-Ade-(DMSO)<sub>4</sub> molecular systems</b> |      |     |     |       |       |
| $E_{\text{int}}^{\text{Na}^+, \text{DMSO-1}}$      | 2.3  | 2.5 | 3.4 | -4.6  | -44.4 |
| $V_{\text{XC}}^{\text{Na}^+, \text{DMSO-1}}$       | 0.0  | 0.0 | 0.0 | 0.0   | -9.9  |
| $V_{\text{cl}}^{\text{Na}^+, \text{DMSO-1}}$       | 2.3  | 2.5 | 3.4 | -4.6  | -34.5 |
| $E_{\text{int}}^{\text{Na}^+, \text{DMSO-2}}$      | 1.4  | 2.3 | 1.5 | -38.4 | -3.8  |
| $V_{\text{XC}}^{\text{Na}^+, \text{DMSO-2}}$       | 0.0  | 0.0 | 0.0 | -9.9  | 0.0   |
| $V_{\text{cl}}^{\text{Na}^+, \text{DMSO-2}}$       | 1.4  | 2.3 | 1.5 | -28.5 | -3.8  |
| <b>K-Ade-(DMSO)<sub>4</sub> molecular systems</b>  |      |     |     |       |       |
| $E_{\text{int}}^{\text{K}^+, \text{DMSO-1}}$       | 2.3  |     |     | -2.6  | -44.7 |
| $V_{\text{XC}}^{\text{K}^+, \text{DMSO-1}}$        | 0.0  |     |     | 0.0   | -13.1 |
| $V_{\text{cl}}^{\text{K}^+, \text{DMSO-1}}$        | 2.3  |     |     | -2.6  | -31.6 |
| $E_{\text{int}}^{\text{K}^+, \text{DMSO-2}}$       | 1.3  |     |     | -34.1 | -6.8  |
| $V_{\text{XC}}^{\text{K}^+, \text{DMSO-2}}$        | 0.0  |     |     | -11.7 | 0.0   |
| $V_{\text{cl}}^{\text{K}^+, \text{DMSO-2}}$        | 1.3  |     |     | -22.4 | -6.8  |

**Table S9:** Intermolecular diatomic interaction energies between the M<sup>+</sup> counter ion (Na<sup>+</sup> and K<sup>+</sup>) with the atoms A of the DMSO-3 solvent molecule of the in-plane M-Ade-(DMSO)<sub>4</sub> molecular systems at the DFT level of theory. All values in kcal mol<sup>-1</sup>

| Atom A of<br>DMSO-3                                | CIPs   |        |        |        |        |
|----------------------------------------------------|--------|--------|--------|--------|--------|
|                                                    | N3N9   | N9     | N3     | N7     | N1     |
| <b>Na-Ade-(DMSO)<sub>4</sub> molecular systems</b> |        |        |        |        |        |
| S36                                                | 114.4  | 116.8  | 114.5  | 114.8  | 116.4  |
| O37                                                | -168.0 | -172.2 | -170.2 | -172.8 | -169.7 |
| C38                                                | -9.7   | -10.5  | -7.6   | -10.6  | -7.5   |
| H39                                                | 4.3    | 4.7    | 3.8    | 6.2    | 4.0    |
| H40                                                | 4.7    | 4.5    | 4.2    | 4.0    | 3.9    |
| H41                                                | 5.7    | 7.4    | 4.1    | 7.3    | 4.0    |
| C42                                                | -7.5   | -7.7   | -9.5   | -8.0   | -10.3  |
| H43                                                | 4.0    | 3.9    | 4.4    | 3.7    | 4.7    |
| H44                                                | 4.0    | 3.9    | 4.3    | 3.4    | 4.8    |
| H45                                                | 4.1    | 4.0    | 6.0    | 5.5    | 7.0    |
| Total:                                             | -43.9  | -45.3  | -46.0  | -46.4  | -42.9  |
| <b>K-Ade-(DMSO)<sub>4</sub> molecular systems</b>  |        |        |        |        |        |
| S36                                                | 104.4  | -      | -      | 104.5  | 106.5  |
| O37                                                | -148.9 | -      | -      | -153.4 | -154.3 |
| C38                                                | -7.2   | -      | -      | -8.8   | -9.3   |
| H39                                                | 3.6    | -      | -      | 4.2    | 4.6    |
| H40                                                | 3.5    | -      | -      | 3.9    | 4.3    |
| H41                                                | 3.6    | -      | -      | 5.3    | 5.0    |
| C42                                                | -9.3   | -      | -      | -7.3   | -7.3   |
| H43                                                | 4.2    | -      | -      | 3.6    | 3.6    |
| H44                                                | 4.4    | -      | -      | 3.7    | 3.7    |
| H45                                                | 5.7    | -      | -      | 3.7    | 3.7    |
| Total:                                             | -36.0  | -      | -      | -40.5  | -39.4  |

**Table S10:** Intermolecular diatomic interaction energies between the  $M^+$  counter ion ( $Na^+$  and  $K^+$ ) with the atoms A of the DMSO-4 solvent molecule of the in-plane M-Ade-(DMSO)<sub>4</sub> molecular systems at the DFT level of theory. All values in kcal mol<sup>-1</sup>

| Atom A of<br>DMSO-4                                | CIPs   |        |        |       |        |
|----------------------------------------------------|--------|--------|--------|-------|--------|
|                                                    | N3N9   | N9     | N3     | N7    | N1     |
| <b>Na-Ade-(DMSO)<sub>4</sub> molecular systems</b> |        |        |        |       |        |
| S36                                                | 116.0  | 114.6  | 116.5  | 70.5  | 113.5  |
| O37                                                | -169.5 | -170.0 | -172.8 | -72.7 | -166.2 |
| C38                                                | -7.6   | -7.5   | -7.7   | -6.6  | -7.7   |
| H39                                                | 3.9    | 3.7    | 4.0    | 3.8   | 3.9    |
| H40                                                | 3.9    | 4.0    | 3.9    | 2.7   | 4.1    |
| H41                                                | 4.0    | 4.1    | 4.0    | 2.8   | 4.1    |
| C42                                                | -9.9   | -9.9   | -10.4  | -11.4 | -8.8   |
| H43                                                | 4.6    | 4.4    | 4.5    | 4.0   | 4.2    |
| H44                                                | 4.7    | 4.3    | 4.7    | 5.5   | 4.3    |
| H45                                                | 6.5    | 5.8    | 7.4    | 7.4   | 5.2    |
| Total:                                             | -43.3  | -46.6  | -45.9  | 5.9   | -43.2  |
| <b>K-Ade-(DMSO)<sub>4</sub> molecular systems</b>  |        |        |        |       |        |
| S36                                                | 102.5  | -      | -      | 47.3  | 61.8   |
| O37                                                | -149.5 | -      | -      | -47.9 | -60.6  |
| C38                                                | -8.8   | -      | -      | -6.8  | -10.3  |
| H39                                                | 3.7    | -      | -      | 3.9   | 7.4    |
| H40                                                | 4.1    | -      | -      | 2.8   | 3.7    |
| H41                                                | 4.8    | -      | -      | 2.5   | 3.7    |
| C42                                                | -7.1   | -      | -      | -5.4  | -7.3   |
| H43                                                | 3.6    | -      | -      | 2.1   | 2.7    |
| H44                                                | 3.6    | -      | -      | 3.5   | 4.8    |
| H45                                                | 3.7    | -      | -      | 2.3   | 2.8    |
| Total:                                             | -39.5  | -      | -      | 4.3   | 8.6    |

**Interactions between DMSO solvent molecules and the adeninate anion Ade<sup>-</sup> in M-Ade-(DMSO)<sub>4</sub> molecular systems**

**Table S11:** The total interaction energy  $E_{\text{int}}^{\text{Ade}^-, \text{DMSO}}$  and its covalent  $V_{\text{XC}}^{\text{Ade}^-, \text{DMSO}}$  and electrostatic  $V_{\text{cl}}^{\text{Ade}^-, \text{DMSO}}$  components computed for the for DMSO-3 and DMSO-4 solvent molecules and Ade<sup>-</sup> in the in-plane M-Ade-(DMSO)<sub>4</sub> molecular systems. All values in kcal mol<sup>-1</sup> at the DFT level of theory.

|                                                    | CIPs  |       |       |       |       |
|----------------------------------------------------|-------|-------|-------|-------|-------|
|                                                    | N3N9  | N9    | N3    | N7    | N1    |
| <b>Na-Ade-(DMSO)<sub>4</sub> molecular systems</b> |       |       |       |       |       |
| $E_{\text{int}}^{\text{Ade}^-, \text{DMSO-3}}$     | -13.5 | -16.0 | -15.9 | -0.4  | -19.7 |
| $V_{\text{XC}}^{\text{Ade}^-, \text{DMSO-3}}$      | -19.9 | -17.4 | -20.7 | -8.9  | -18.0 |
| $V_{\text{cl}}^{\text{Ade}^-, \text{DMSO-3}}$      | 6.4   | 1.4   | 4.8   | 8.5   | -1.7  |
| $E_{\text{int}}^{\text{Ade}^-, \text{DMSO-4}}$     | -13.3 | -14.9 | -15.2 | -39.6 | -20.4 |
| $V_{\text{XC}}^{\text{Ade}^-, \text{DMSO-4}}$      | -17.5 | -21.1 | -16.7 | -27.4 | -19.3 |
| $V_{\text{cl}}^{\text{Ade}^-, \text{DMSO-4}}$      | 4.1   | 6.2   | 1.6   | -12.2 | -1.2  |
| <b>K-Ade-(DMSO)<sub>4</sub> molecular systems</b>  |       |       |       |       |       |
| $E_{\text{int}}^{\text{Ade}^-, \text{DMSO-3}}$     | -11.8 |       |       | -25.2 | -20.8 |
| $V_{\text{XC}}^{\text{Ade}^-, \text{DMSO-3}}$      | -15.5 |       |       | -23.2 | -17.6 |
| $V_{\text{cl}}^{\text{Ade}^-, \text{DMSO-3}}$      | 3.8   |       |       | -2.0  | -3.2  |
| $E_{\text{int}}^{\text{Ade}^-, \text{DMSO-4}}$     | -14.0 |       |       | -42.2 | -25.0 |
| $V_{\text{XC}}^{\text{Ade}^-, \text{DMSO-4}}$      | -19.5 |       |       | -29.8 | -23.9 |
| $V_{\text{cl}}^{\text{Ade}^-, \text{DMSO-4}}$      | 5.4   |       |       | -12.5 | -1.1  |
